# Supplementary material for: Cocirculation of Four Infectious Bronchitis Virus Lineages in Broiler Chickens in the Eastern Region of Saudi Arabia from 2012 to 2014
Source: Hindawi journal article supplement (doi:10.1155/2020/6037893), 2020-03-31
Supplement: f1 [file 6037893.f1.pdf]

Supplementary Table 1: Nucleotide identity matrix based on partial S1 gene sequences from seventeen IBV isolates and the most related reference sequences. The reference sequences are shown in bold font. Sequences with 100% identity are not shown, including the following: SA/IH9/13, SA/IH11/13, SA/IH12/13, SA/IH15/13, SA/IH16/13, SA/IC10/13, SA/IC71/13, SA/IC78/13 and SA/IC80/13 resembling SA/IH7/12; SA/IH19/13, SA/IH25/13, SA/IH26/13, SA/IH27/13, SA/IH28/13, SA/IH29/13, SA/IC7/13 and SA/IC16/13 resembling SA/IH8/12; SA/H21/13, SA/IH22/13, SA/IC3/13, SA/IC24/13 and SA/IC72/13 resembling SA/IH6/12; SA/H14/13 resembling SA/H10/13; and SA/C8/13 and SA/IC9/13 resembling SA/IC6/13.

| Seq->                                   | 1    | 2    | 3    | 4    | 5    | 6    | 7    | 8    | 9    | 10   | 11   | 12   | 13   | 14   | 15   | 16   | 17   | 18   | 19   | 20   | 21   | 22 |  |
|-----------------------------------------|------|------|------|------|------|------|------|------|------|------|------|------|------|------|------|------|------|------|------|------|------|----|--|
| <b>1 Q1 (AF286302)</b>                  |      |      |      |      |      |      |      |      |      |      |      |      |      |      |      |      |      |      |      |      |      |    |  |
| 2 SA/IH5/12                             | 99.6 |      |      |      |      |      |      |      |      |      |      |      |      |      |      |      |      |      |      |      |      |    |  |
| 3 SA/IH7/12                             | 100  | 99.6 |      |      |      |      |      |      |      |      |      |      |      |      |      |      |      |      |      |      |      |    |  |
| 4 SA/IC15/13                            | 99   | 98.7 | 99   |      |      |      |      |      |      |      |      |      |      |      |      |      |      |      |      |      |      |    |  |
| <b>5 4/91 (AF093794)</b>                | 81.6 | 81.3 | 81.6 | 82.5 |      |      |      |      |      |      |      |      |      |      |      |      |      |      |      |      |      |    |  |
| 6 SA/IH3/12                             | 81.3 | 81   | 81.3 | 82.2 | 99.6 |      |      |      |      |      |      |      |      |      |      |      |      |      |      |      |      |    |  |
| 7 SA/IH8/12                             | 81.6 | 81.3 | 81.6 | 82.5 | 100  | 99.6 |      |      |      |      |      |      |      |      |      |      |      |      |      |      |      |    |  |
| 8 SA/IC14/13                            | 81   | 80.7 | 81   | 81.9 | 96.9 | 96.6 | 96.9 |      |      |      |      |      |      |      |      |      |      |      |      |      |      |    |  |
| 9 SA/IC62/13                            | 81.9 | 81.6 | 81.9 | 82.8 | 99   | 98.7 | 99   | 96   |      |      |      |      |      |      |      |      |      |      |      |      |      |    |  |
| 10 SA/IC69/13                           | 82.2 | 81.9 | 82.2 | 83.1 | 98.1 | 97.8 | 98.1 | 95.7 | 98.4 |      |      |      |      |      |      |      |      |      |      |      |      |    |  |
| <b>11 H120 Vaccine (M21970)</b>         | 79.5 | 79.2 | 79.5 | 79.8 | 77.3 | 77.3 | 77.3 | 77   | 78.2 | 77.9 |      |      |      |      |      |      |      |      |      |      |      |    |  |
| 12 SA/IH6/12                            | 79.5 | 79.2 | 79.5 | 79.8 | 77.3 | 77.3 | 77.3 | 77   | 78.2 | 77.9 | 100  |      |      |      |      |      |      |      |      |      |      |    |  |
| 13 SA/IH20/13                           | 79.5 | 79.2 | 79.5 | 79.8 | 77.3 | 77.3 | 77.3 | 77   | 78.2 | 77.9 | 99.6 | 99.6 |      |      |      |      |      |      |      |      |      |    |  |
| 14 SA/IC79/13                           | 78.5 | 78.2 | 78.5 | 78.8 | 77   | 76.7 | 77   | 76.7 | 77.9 | 77.6 | 97.8 | 97.8 | 97.5 |      |      |      |      |      |      |      |      |    |  |
| <b>15 Iran/IS720/H140/11 (KP310018)</b> | 80.4 | 80.7 | 80.4 | 81   | 82.2 | 81.9 | 82.2 | 81.3 | 81.9 | 82.2 | 82.2 | 82.2 | 81.9 | 81.3 |      |      |      |      |      |      |      |    |  |
| 16 SA/IC84/13                           | 79.5 | 79.5 | 79.5 | 80.1 | 81.3 | 81   | 81.3 | 81   | 81   | 81.3 | 81.3 | 81.3 | 81   | 80.4 | 97.8 |      |      |      |      |      |      |    |  |
| 17 SA/IC5/13                            | 80.1 | 80.4 | 80.1 | 80.7 | 81.9 | 81.6 | 81.9 | 81   | 81.6 | 81.9 | 81.6 | 81.6 | 81.3 | 80.7 | 99.3 | 97.8 |      |      |      |      |      |    |  |
| 18 SA/IC6/13                            | 80.7 | 81   | 80.7 | 81.3 | 82.2 | 81.9 | 82.2 | 81.3 | 81.9 | 82.2 | 82.2 | 82.2 | 81.9 | 81.3 | 99   | 97.5 | 99   |      |      |      |      |    |  |
| 19 SA/IC84/13                           | 80.1 | 80.1 | 80.1 | 80.7 | 82.2 | 81.9 | 82.2 | 81.3 | 81.9 | 82.2 | 82.2 | 82.2 | 81.9 | 81.3 | 98.1 | 99   | 98.1 | 97.8 |      |      |      |    |  |
| <b>20 IS/1494 (EU780077)</b>            | 83.1 | 82.8 | 83.1 | 83.7 | 83.1 | 83.1 | 83.1 | 82.8 | 83.7 | 83.4 | 82.8 | 82.8 | 82.8 | 81.3 | 86.2 | 86.2 | 86.2 | 86.8 | 86.5 |      |      |    |  |
| 21 SA/IH1/12                            | 83.1 | 82.8 | 83.1 | 83.7 | 83.1 | 83.1 | 83.1 | 82.8 | 83.7 | 83.4 | 82.8 | 82.8 | 82.8 | 81.3 | 86.2 | 86.2 | 86.2 | 86.8 | 86.5 | 100  |      |    |  |
| 22 SA/IH31/14                           | 84.4 | 84   | 84.4 | 84.4 | 82.8 | 82.8 | 82.8 | 82.8 | 83.4 | 83.1 | 81.6 | 81.6 | 81.6 | 80.1 | 85   | 85   | 85   | 85.6 | 85.3 | 97.8 | 97.8 |    |  |
